# Supplementary material
Source: publisher site journal article supplement (https://www.dovepress.com/get_supplementary_file.php?f=407323.docx)
Supplement: Supplementary file 1 [file get_supplementary_file.php]

**Supplementary Table 1: 31 miRNAs were found to have potential binding site with ZSCAN16-AS1**

| **hsa-miR-26a-5p** |
| --- |
| **hsa-miR-15a-5p** |
| **hsa-let-7a-5p** |
| **hsa-let-7b-5p** |
| **hsa-let-7c-5p** |
| **hsa-let-7e-5p** |
| **hsa-let-7f-5p** |
| **hsa-let-7g-5p** |
| **hsa-let-7i-5p** |
| **hsa-miR-1-3p** |
| **hsa-miR-135a-5p** |
| **hsa-miR-143-3p** |
| **hsa-miR-15b-5p** |
| **hsa-miR-16-5p** |
| **hsa-miR-181a-5p** |
| **hsa-miR-181b-5p** |
| **hsa-miR-181d-5p** |
| **hsa-miR-185-5p** |
| **hsa-miR-193b-3p** |
| **hsa-miR-195-5p** |
| **hsa-miR-24-3p** |
| **hsa-miR-26b-5p** |
| **hsa-miR-29a-3p** |
| **hsa-miR-320a-3p** |
| **hsa-miR-34a-5p** |
| **hsa-miR-433-3p** |
| **hsa-miR-503-5p** |
| **hsa-miR-7-5p** |
| **hsa-miR-9-5p** |
| **hsa-miR-93-5p** |
| **hsa-miR-98-5p** |
